# Supplementary material
Source: Elsevier journal article supplement (https://www.sciencedirect.com/science/article/pii/S2173572722001266)
Supplement: mmc1 [file S2173572722001266:mmc1.pdf]

## **Supplemental Electronic Material 1**

**Supplemental electronic material 1.** Measure of Moral Distress – Healthcare Professionals (MMD-HP) questionnaire. MMD-HP questionnaire to measure moral distress levels among healthcare professionals

|                                                                                                                                                                  | Frequency |   |                 |   |   | Level of Distress |   |                  |   |   |
|------------------------------------------------------------------------------------------------------------------------------------------------------------------|-----------|---|-----------------|---|---|-------------------|---|------------------|---|---|
|                                                                                                                                                                  | Never     |   | Very frequently |   |   | None              |   | Very distressing |   |   |
|                                                                                                                                                                  | 0         | 1 | 2               | 3 | 4 | 0                 | 1 | 2                | 3 | 4 |
| 1. Witness healthcare providers giving “false hope” to a patient or family.                                                                                      |           |   |                 |   |   |                   |   |                  |   |   |
| 2. Follow the family’s insistence to continue aggressive treatment even though I believe it is not in the best interest of the patient.                          |           |   |                 |   |   |                   |   |                  |   |   |
| 3. Feel pressured to order or carry out orders for what I consider to be unnecessary or inappropriate tests and treatments.                                      |           |   |                 |   |   |                   |   |                  |   |   |
| 4. Be unable to provide optimal care due to pressures from administrators or insurers to reduce costs.                                                           |           |   |                 |   |   |                   |   |                  |   |   |
| 5. Continue to provide aggressive treatment for a person who is most likely to die regardless of this treatment when no one will make a decision to withdraw it. |           |   |                 |   |   |                   |   |                  |   |   |
| 6. Be pressured to avoid taking action when I learn that a physician, nurse, or other team colleague has made a medical error and does not report it.            |           |   |                 |   |   |                   |   |                  |   |   |
| 7. Be required to care for patients whom I do not feel qualified to care for.                                                                                    |           |   |                 |   |   |                   |   |                  |   |   |
| 8. Participate in care that causes unnecessary suffering or does not adequately relieve pain or symptoms.                                                        |           |   |                 |   |   |                   |   |                  |   |   |
| 9. Watch patient care suffer because of a lack of provider continuity.                                                                                           |           |   |                 |   |   |                   |   |                  |   |   |
| 10. Follow a physician’s or family member’s request not to discuss the patient’s prognosis with the patient/family.                                              |           |   |                 |   |   |                   |   |                  |   |   |
| 11. Witness a violation of a standard of practice or a code of ethics and not feel sufficiently supported to report the violation.                               |           |   |                 |   |   |                   |   |                  |   |   |
| 12. Participate in care that I do not agree with, but do so because of fears of litigation.                                                                      |           |   |                 |   |   |                   |   |                  |   |   |

|                                                                                                                                | Frequency |   |                 |   |   | Level of Distress |   |                  |   |   |
|--------------------------------------------------------------------------------------------------------------------------------|-----------|---|-----------------|---|---|-------------------|---|------------------|---|---|
|                                                                                                                                | Never     |   | Very frequently |   |   | None              |   | Very distressing |   |   |
|                                                                                                                                | 0         | 1 | 2               | 3 | 4 | 0                 | 1 | 2                | 3 | 4 |
| 13. Be required to work with other healthcare team members who are not as competent as patient care requires.                  |           |   |                 |   |   |                   |   |                  |   |   |
| 14. Witness low quality of patient care due to poor team communication.                                                        |           |   |                 |   |   |                   |   |                  |   |   |
| 15. Feel pressured to ignore situations in which patients have not been given adequate information to ensure informed consent. |           |   |                 |   |   |                   |   |                  |   |   |
| 16. Be required to care for more patients than I can safely care for.                                                          |           |   |                 |   |   |                   |   |                  |   |   |
| 17. Experience compromised patient care due to lack of resources/equipment/bed capacity.                                       |           |   |                 |   |   |                   |   |                  |   |   |
| 18. Experience lack of administrative action or support for a problem that is compromising patient care.                       |           |   |                 |   |   |                   |   |                  |   |   |
| 19. Have excessive documentation requirements that compromise patient care.                                                    |           |   |                 |   |   |                   |   |                  |   |   |
| 20. Fear retribution if I speak up.                                                                                            |           |   |                 |   |   |                   |   |                  |   |   |
| 21. Feel unsafe/bullied amongst my own colleagues.                                                                             |           |   |                 |   |   |                   |   |                  |   |   |
| 22. Be required to work with abusive patients/family members who are compromising quality of care.                             |           |   |                 |   |   |                   |   |                  |   |   |
| 23. Feel required to overemphasize tasks and productivity or quality measures at the expense of patient care.                  |           |   |                 |   |   |                   |   |                  |   |   |
| 24. Be required to care for patients who have unclear or inconsistent treatment plans or who lack goals of care.               |           |   |                 |   |   |                   |   |                  |   |   |
| 25. Work within power hierarchies in teams, units, and my institution that compromise patient care.                            |           |   |                 |   |   |                   |   |                  |   |   |
| 26. Participate on a team that gives inconsistent messages to a patient/family.                                                |           |   |                 |   |   |                   |   |                  |   |   |
| 27. Work with team members who do not treat vulnerable or stigmatized patients with dignity and respect.                       |           |   |                 |   |   |                   |   |                  |   |   |
| If there are other situations in which you have felt moral distress, please write and score them here:                         |           |   |                 |   |   |                   |   |                  |   |   |
|                                                                                                                                |           |   |                 |   |   |                   |   |                  |   |   |
|                                                                                                                                |           |   |                 |   |   |                   |   |                  |   |   |

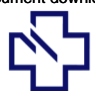

SERVIZO  
GALEGO  
de SAÚDE

**Área Sanitaria de Santiago de Compostela  
e Barbanza**  
Servicio de Medicina Intensiva

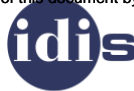

INSTITUTO DE INVESTIGACIÓN SANITARIA  
SANTIAGO DE COMPOSTELA

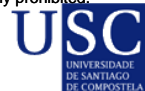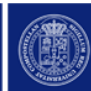

Have you ever left or considered leaving a clinical position due to moral distress?

- No, I have never considered leaving or left a position.
- Yes, I considered leaving but did not leave.
- Yes, I left a position.

Are you considering leaving your position now due to moral distress?

- Yes
- No
